# Supplementary material for: A Highly Sensitive Deep-Sea Hydrodynamic Pressure Sensor Inspired by Fish Lateral Line
Source: Biomimetics (Basel). 2024 Mar 20;9(3):190. doi: 10.3390/biomimetics9030190 (PMC10968026; doi:10.3390/biomimetics9030190)
Supplement: Supplementary file 1 [file biomimetics-09-00190-s001.zip]

Archive with 7 entries (7 files):
- Deep-ses hydrodynamic pressure sensor-ESM-biomimetics.pdf
- Movie S1 Structure-electrostatic Multiphysics coupling simulations (Piezopotential distribution within piezoelectric film).mp4
- Movie S2 FSI analysis for vibrating sphere location by DSHPS array (Position 1).mp4
- Movie S3 FSI analysis for vibrating sphere location by DSHPS array (Position 2).mp4
- Movie S4 FSI analysis for vibrating sphere location by DSHPS array (Position 3).mp4
- Movie S5 FSI analysis for vibrating sphere location by DSHPS array (Position 4).mp4
- Movie S6 FSI analysis for vibrating sphere location by DSHPS array (Position 5).mp4
